# Supplementary material for: Hydrogenolysis of biomass-derived sorbitol over La-promoted Ni/ZrO2 catalysts
Source: Royal Society of Chemistry journal article supplement (doi:10.1039/c9ra10394e), 2020-01-01
Supplement: c9ra10394e1.pdf [file c9ra10394e1.pdf]

## Supplementary Information

Figure S1 Scanning electron microscope image of 10% Ni/5% La<sub>2</sub>O<sub>3</sub>/ZrO<sub>2</sub> catalyst.

Figure S2 H<sub>2</sub> temperature-programmed reduction profiles of catalysts with different La promoters.

Figure S3 CO<sub>2</sub> temperature-programmed desorption profiles of catalysts with different La promoters.

Figure S4 Stability and regeneration test of 10% Ni/5% La<sub>2</sub>O<sub>3</sub>/ZrO<sub>2</sub> in sorbitol hydrogenolysis to glycols. Reaction conditions: 10% sorbitol contained in an aqueous solution of 40 ml; catalyst amount = 1 g; temperature = 220°C; initial H<sub>2</sub> pressure = 4 MPa; time = 4 h.

Figure S5 Thermogravimetry and derivative thermogravimetry profiles of 10% Ni/5% La<sub>2</sub>O<sub>3</sub>/ZrO<sub>2</sub> catalyst after sorbitol hydrogenolysis and drying at 100°C.

Scheme S1 Possible pathways for sorbitol hydrogenolysis.

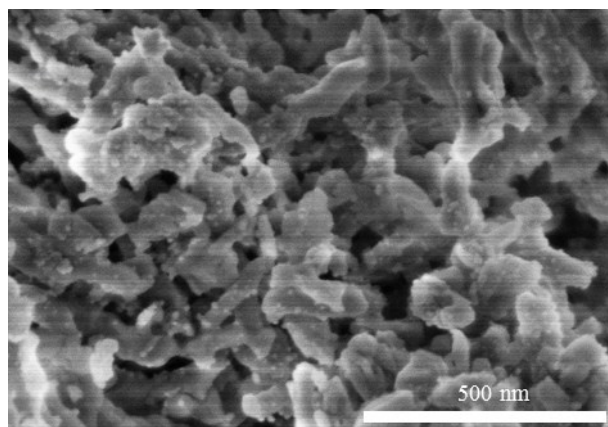

**Figure S1** Scanning electron microscope image of 10%Ni/5% La<sub>2</sub>O<sub>3</sub>/ZrO<sub>2</sub> catalyst

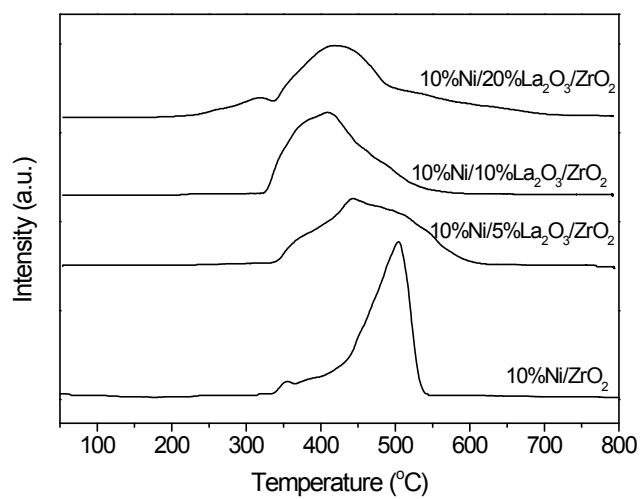

**Figure S2** H<sub>2</sub> temperature-programmed reduction profiles of catalysts with different La promoters

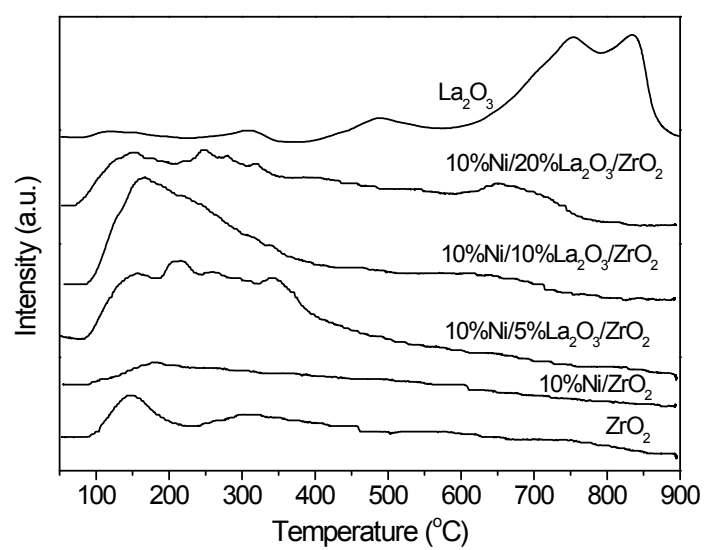

**Figure S3** CO<sub>2</sub> temperature-programmed desorption profiles of catalysts with different La promoters

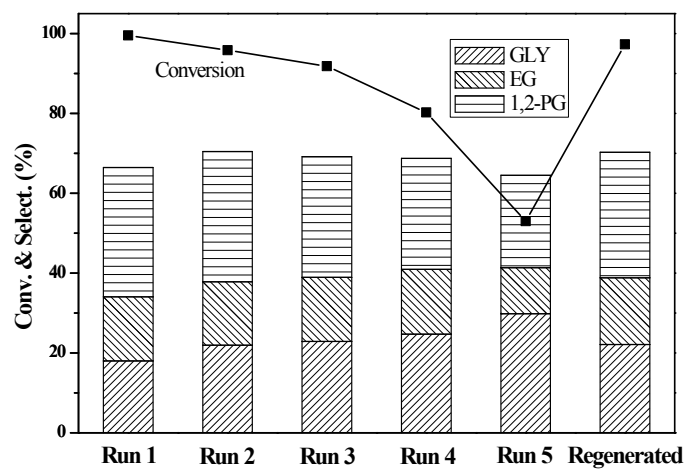

**Figure S4** Stability and regeneration test of 10%Ni/5%La<sub>2</sub>O<sub>3</sub>/ZrO<sub>2</sub> in sorbitol hydrogenolysis to glycols. Reaction conditions: 10% sorbitol contained in an aqueous solution of 40 ml; catalyst amount = 1 g; temperature = 220°C; initial H<sub>2</sub> pressure = 4 MPa; time = 4 h.

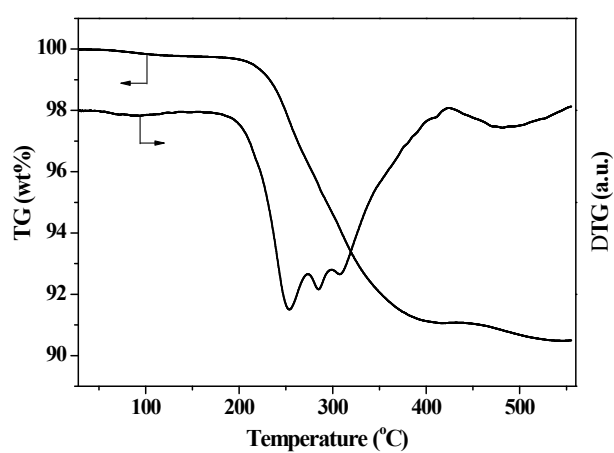

**Figure S5** Thermogravimetry and derivative thermogravimetry profiles of 10%Ni/5%La<sub>2</sub>O<sub>3</sub>/ZrO<sub>2</sub> catalyst after sorbitol hydrogenolysis and drying at 100 °C.

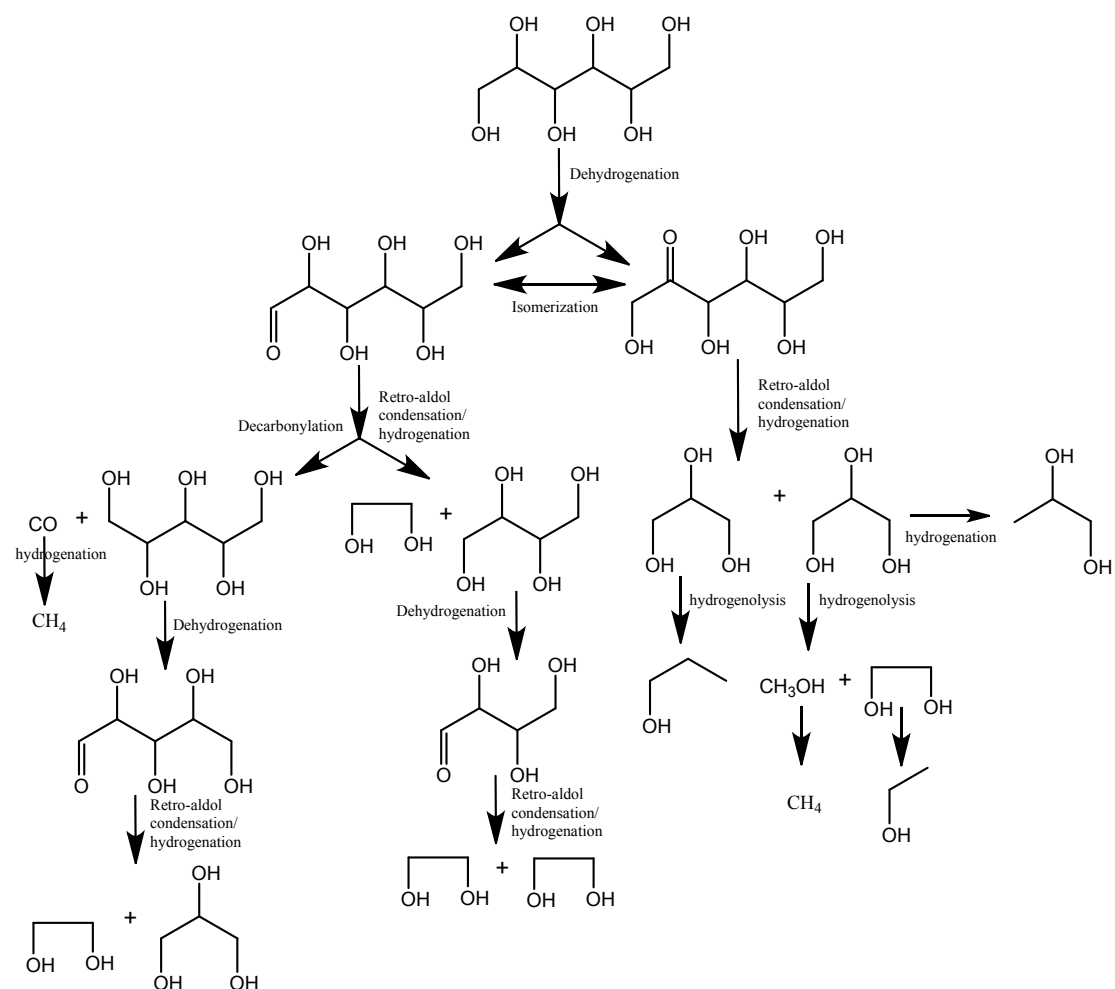

**Scheme S1** Possible pathways for sorbitol hydrogenolysis to glycols.
